# Supplementary material for: Modulating membrane fluidity corrects Batten disease phenotypes in vitro and in vivo
Source: PubMed Central journal article supplement — Neurobiol Dis. Author manuscript; Available in PMC 2018 Jul 1. (PMC5969532; doi:10.1016/j.nbd.2018.04.010), 2018-04-13

**Figure S1.** Lipid microdomains were enriched by cell fractionation and the amplex red assay used to quantify cholesterol levels in each fraction. Data are from three independent experiments. Statistical significance was determined by 2-way ANOVA with Tukey's multiple comparison test.

\*\*  $p < 0.01$

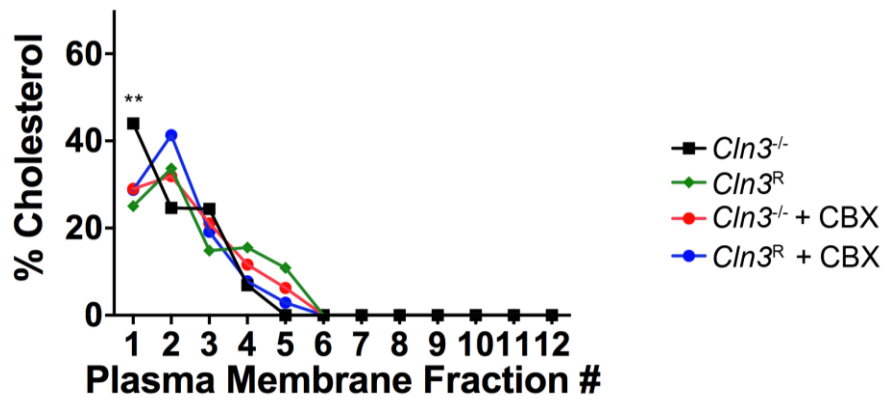

**Figure S2.** Cell migration. A scratch was made on a confluent monolayer of *Cln3<sup>R</sup>* or *Cln3<sup>-/-</sup>* MBECs treated with vehicle of CBX (3.5  $\mu$ M) overnight and cells imaged over 15 hours with a live cell microscope.

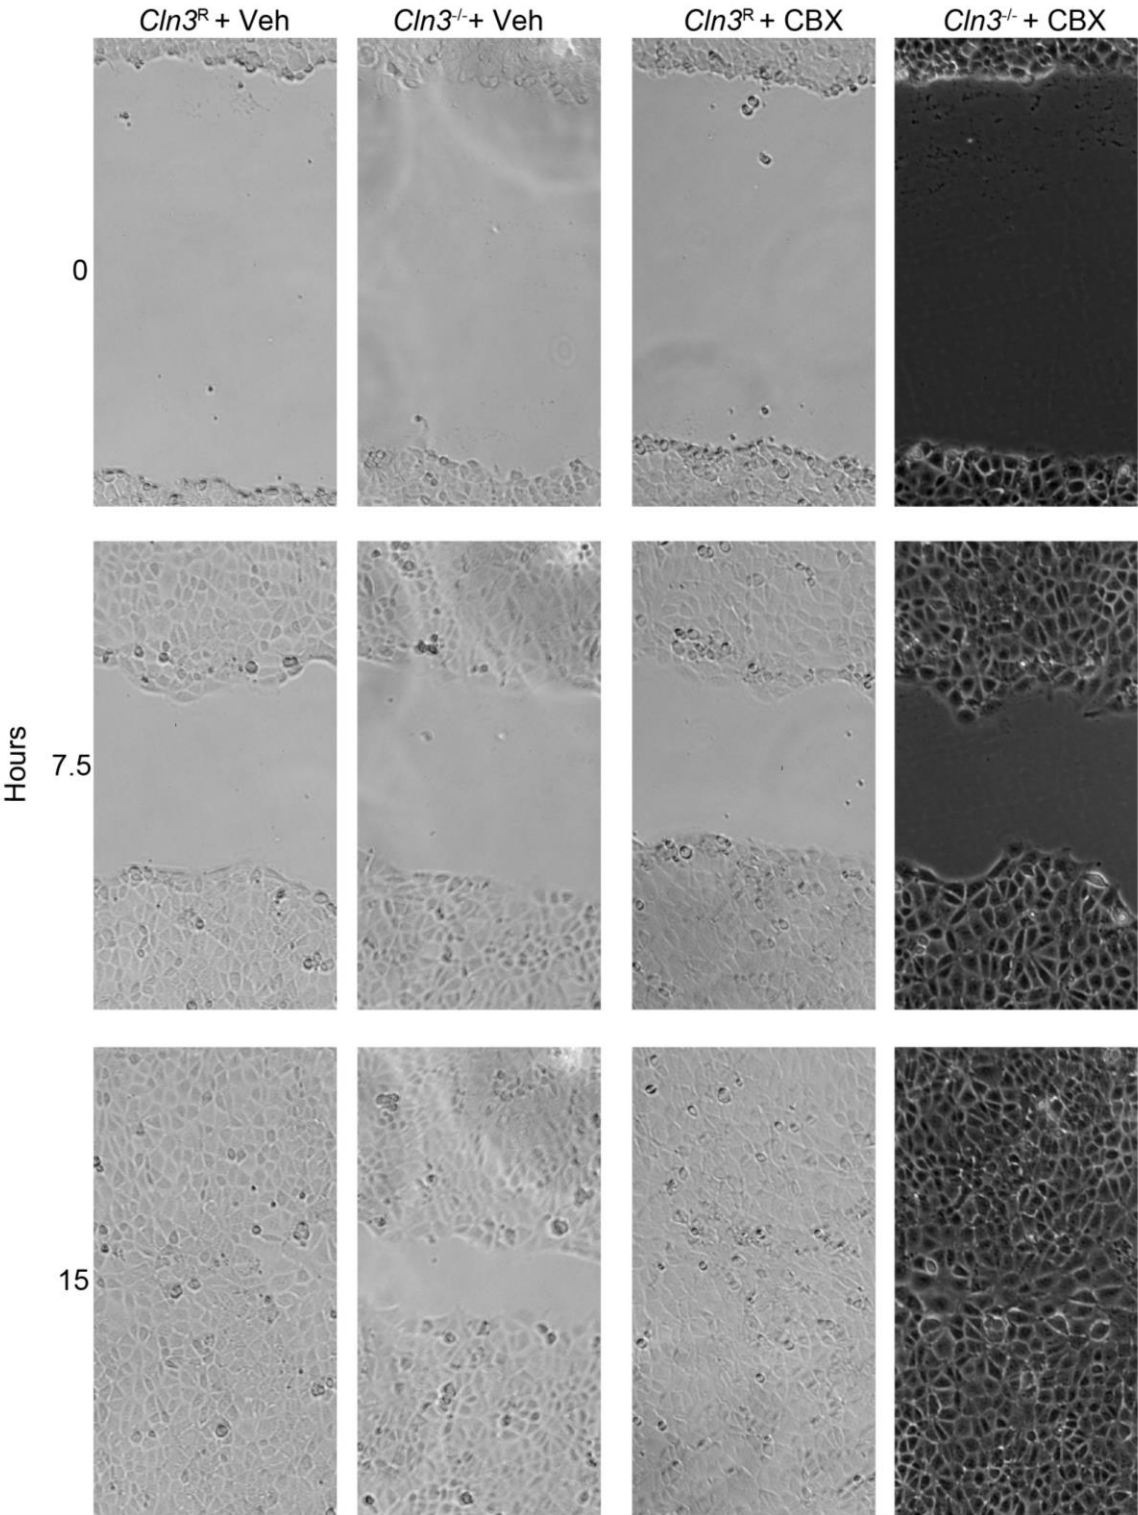

Supplement: NIHMS967406-supplement.pdf [file NIHMS967406-supplement.pdf]
